# Supplementary material for: Resveratrol-Induced Vascular Progenitor Differentiation towards Endothelial Lineage via MiR-21/Akt/β-Catenin Is Protective in Vessel Graft Models
Source: PubMed Central journal article supplement (PMC4427364; doi:10.1371/journal.pone.0125122), 2015-05-11
Supplement: pone.0125122.s006.pdf [file pone.0125122.s006.pdf]

Supplemental Table 1: Primer sequences

| <b>Gene Target</b> | <b>Sequence (5' → 3')</b>                                    |
|--------------------|--------------------------------------------------------------|
| <b>β-actin</b>     | <b>GGCTGTATCCCCTCCATCG<br/>CCAGTTGGTAACAATGCCATGT</b>        |
| <b>CD31</b>        | <b>CAAACAGAAACCCGTGGAGAT<br/>ACCGTAATGGCTGTTGGCTTC</b>       |
| <b>VE-cadherin</b> | <b>AAGAAACCGCTGATCGGCA<br/>TCGGAAGAATTGGCCTCTGTC</b>         |
| <b>eNOS</b>        | <b>GGCTGGGTTTAGGGCTGTG<br/>CTGAGGGTGTCGTAGGTGATG</b>         |
| <b>SMA</b>         | <b>TCCTGACGCTGAAGTATCCGAT<br/>GGCCACACGAAGCTCGTTATAG</b>     |
| <b>β-catenin</b>   | <b>TGCAGCTTCTGGGTTCCGATGATA<br/>AGATGGCAGGCTCAGTGATGTCTT</b> |
| <b>SM22</b>        | <b>GATATGGCAGCAGTGCAGAG<br/>AGTTGGCTGTCTGTGAAGTC</b>         |
| <b>PTEN</b>        | <b>TGGATTCGACTTAGACTTGACCT<br/>GCGGTGTCATAATGTCTCTCAG</b>    |
